# Supplementary material
Source: publisher figshare collection journal article supplement (https://sage.figshare.com/ndownloader/files/14862164)
Supplement: Supplementary file 1 [file 14862164]

Table S1. Effect of covariates on TL

| Covariate | N | Mean±SD |
| --- | --- | --- |
| overall | 150 | 1.05±0.31 |
| Height <170 cm | 57 | 1.07±0.21 |
| Height ≥170 cm | 93 | 1.05±0.36 |
| Pa |  | 0.66 |
| Weight <75 kg | 63 | 1.11±0.32 |
| Weight ≥75 kg | 87 | 1.02±0.29 |
| Pa |  | 0.34 |
| BMI <25 kg/m2 | 67 | 1.07±0.34 |
| BMI ≥25 kg/m2 | 83 | 1.04±0.28 |
| Pa |  | 0.89 |
| Age<34 y | 83 | 1.07±0.26 |
| Age ≥34 y | 67 | 1.03±0.36 |
| Pa |  | 0.127 |
| Residence <10 y | 86 | 1.01±0.27 |
| Residence ≥10 y | 64 | 1.11±0.34 |
| Pa |  | 0.087 |
| Live in place <8 y | 105 | 1.08±0.31 |
| Live in place ≥8 y | 45 | 0.99±0.29 |
| Pa |  | 0.163 |
| Never Smoker | 95 | 1.05±0.27 |
| Ever Smoker | 55 | 1.06±0.36 |
| Pa |  | 0.747 |
| pack-years <30 | 25 | 1.04±0.23 |
| pack-years ≥30 | 39 | 1.06±0.31 |
| Pa |  | 0.822 |
| TC<185 mg/dl | 63 | 1.12±0.33 |
| TC ≥185 mg/dl | 87 | 1.01±0.28 |
| Pa |  | 0.28 |
| TG<150 mg/dl | 47 | 1.04±0.23 |
| TG ≥150 mg/dl | 103 | 1.06±0.34 |
| Pa |  | 0.779 |
| FC <50 mg/dl | 69 | 1.07±0.29 |
| FC ≥50 mg/dl | 81 | 1.04±0.32 |
| Pa |  | 0.678 |
| PL <200 mg/dl | 59 | 1.07±0.31 |
| PL ≥200 mg/dl | 91 | 1.04±0.31 |
| Pa |  | 0.421 |
| TSL <630 mg/dl | 52 | 1.09±0.32 |
| TSL ≥ 630 mg/dl | 98 | 1.03±0.3 |
| Pa |  | 0.194 |

NOTE: Significant P-values are shown in bold.

a Wilcoxon test.

Table S2. Multivariate linear regression coeffecents between logT/S and serum lipids (TC, TG, PL and TSL) adjusted for age, residence, live in place, pack-years and smoking status

| Parameters | Estimate | Lower | Upper | Std. Error | t-value | Pr(>|t|) |  |
| --- | --- | --- | --- | --- | --- | --- | --- |
| Intercept | 0.2467 | 0.1581 | 0.3354 | 0.0450 | 5.48 | 0.0000 | *** |
| age | -0.0002 | -0.0022 | 0.0018 | 0.0010 | -0.181 | 0.8568 |  |
| BMI | -0.0019 | -0.0003 | -0.0034 | 0.0008 | -2.4160 | 0.016321 | * |
| Residence | 0.0003 | -0.0006 | 0.0012 | 0.0005 | 0.711 | 0.4778 |  |
| Live in place | -0.0018 | -0.0034 | -0.0003 | 0.0008 | -2.375 | 0.0182 | * |
| Pack-years | -0.000004 | -0.000015 | 0.000007 | 0.000006 | -0.6890 | 0.4912 |  |
| Previously smoker | 0.0053 | -0.0173 | 0.0278 | 0.0115 | 0.46 | 0.6462 |  |
| Second-hand smoker | 0.0031 | -0.0199 | 0.0261 | 0.0117 | 0.262 | 0.7938 |  |
| Smoker | -0.0126 | -0.0323 | 0.0071 | 0.0100 | -1.258 | 0.2096 |  |
| TC | 0.0001 | -0.0006 | 0.0007 | 0.0004 | 0.155 | 0.8766 |  |
| TG | -0.0010 | -0.0015 | -0.0004 | 0.0003 | -3.346 | 0.0009 | *** |
| PL | 0.0001 | -0.0005 | 0.0007 | 0.0003 | 0.348 | 0.7280 |  |
| TSL | -0.0003 | -0.0008 | 0.0001 | 0.0002 | -1.522 | 0.1290 |  |

Signif. codes: 0 ‘***’ 0.001 ‘**’ 0.01 ‘*’ 0.05 ‘.’ 0.1 ‘ ’ 1
